# Supplementary material
Source: PubMed Central journal article supplement (PMC1599939)

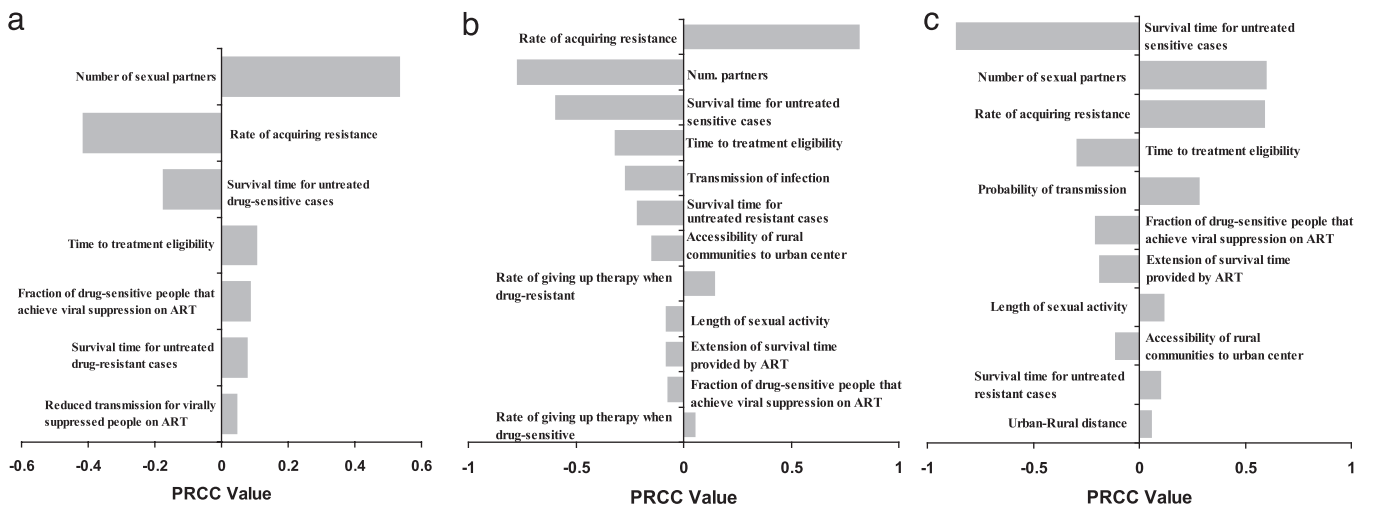

Supplement: pnas_0509689103_1.pdf [file pnas_0509689103_1.pdf]
